# Supplementary material for: Generation of highly reactive oxygen species on metal-supported MgO(100) thin films
Source: Royal Society of Chemistry journal article supplement (doi:10.1039/c6cp03236b), 2016-01-01
Supplement: c6cp03236b1.pdf [file c6cp03236b1.pdf]

# **Generation of highly reactive oxygen species on metal-supported MgO(100) thin films**

Zhenjun Song, Jing Fan, Yueyue Shan, Alan Man Ching Ng, Hu Xu

Department of Physics, South University of Science and Technology of China, Shenzhen, 518055,  
China

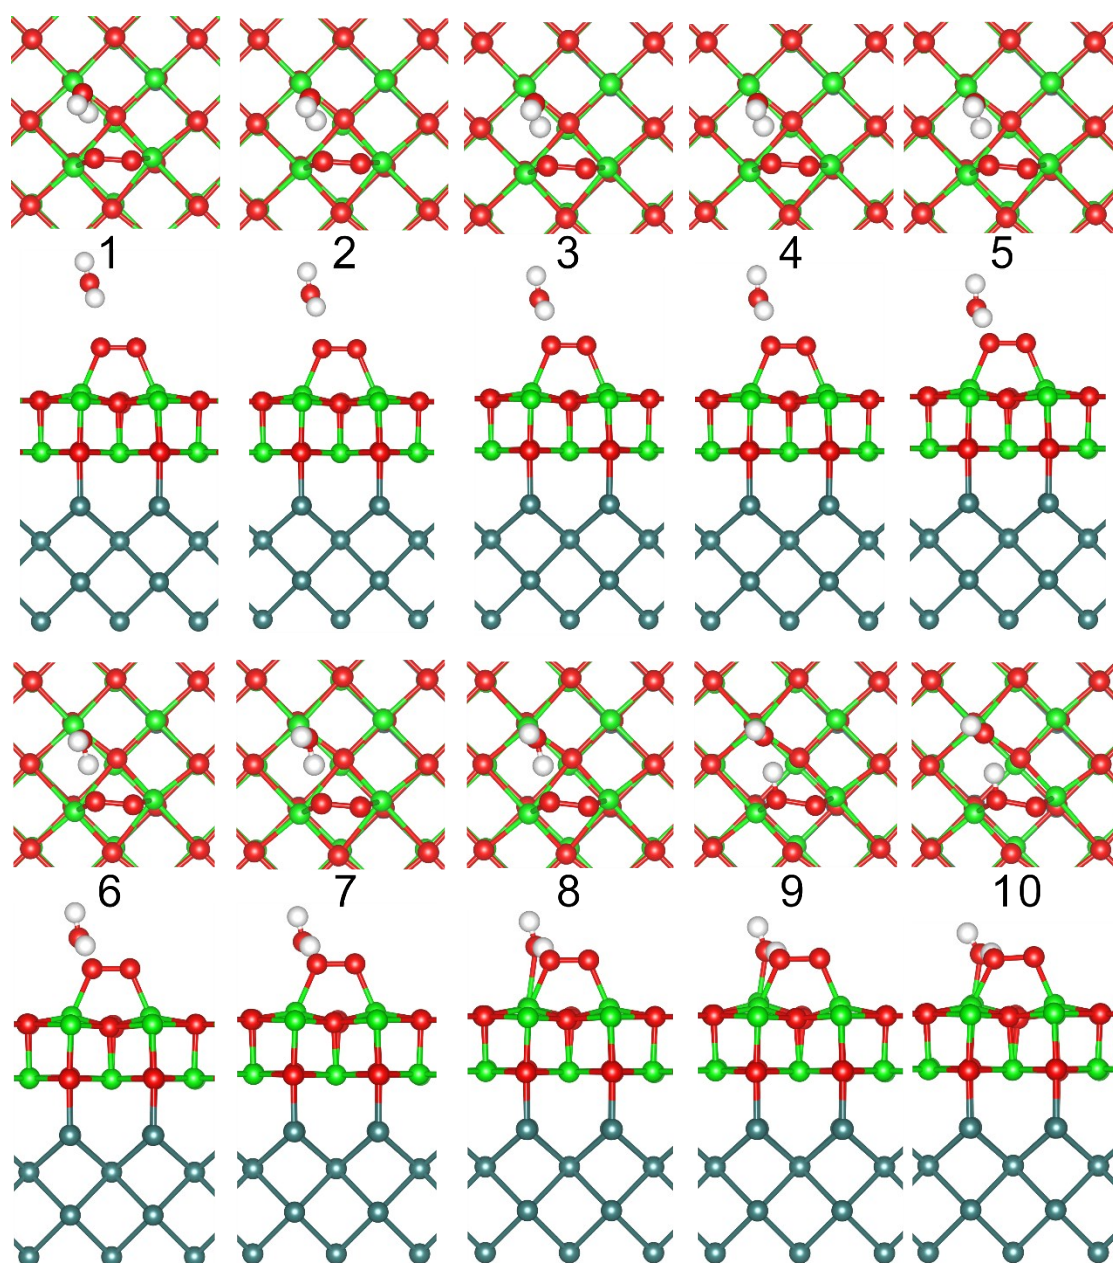

Fig. S1. Geometrical configurations for the image points of OOH formation pathway on 2 ML MgO(100)/Mo(100) shown in Fig. 4. The Arabic numerals 1-10 label all relevant reaction steps.

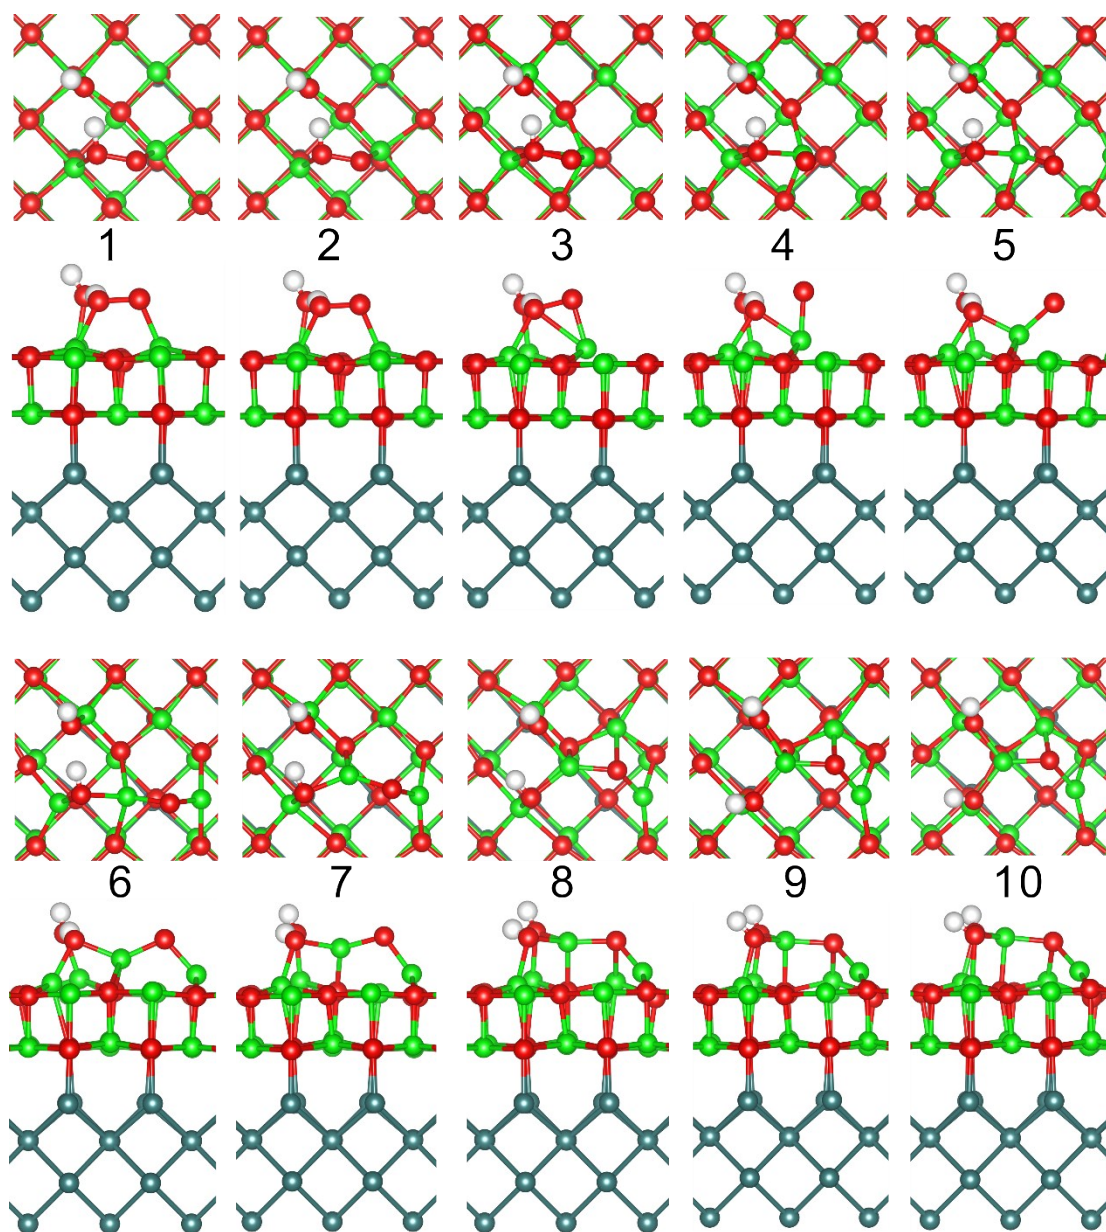

Fig. S2. Geometrical configurations for the image points of producing high reactive oxygen adatom and hydroxyl species on 2 ML MgO/Mo(100) surface shown in Fig. 5. The Arabic numerals 1-10 label all relevant reaction steps..

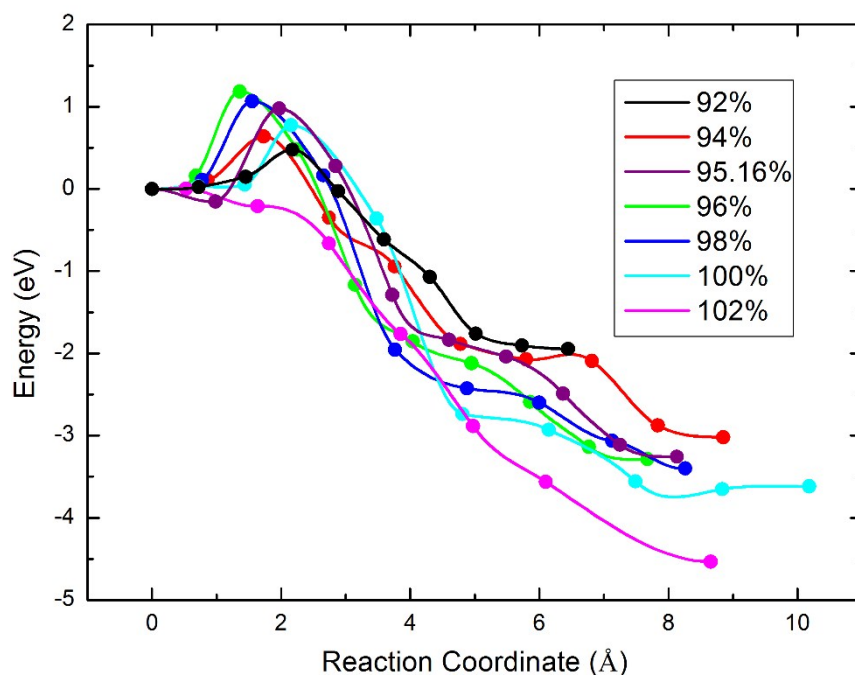

Fig. S3. Potential energy profiles for OOH splitting to produce OH and oxygen adatom on 2 ML MgO/Mo(100) surfaces with various lattice constants of Mo substrate. The corresponding lattice mismatches between MgO film and Mo substrate is in the range from -3.3% to 7.2%.

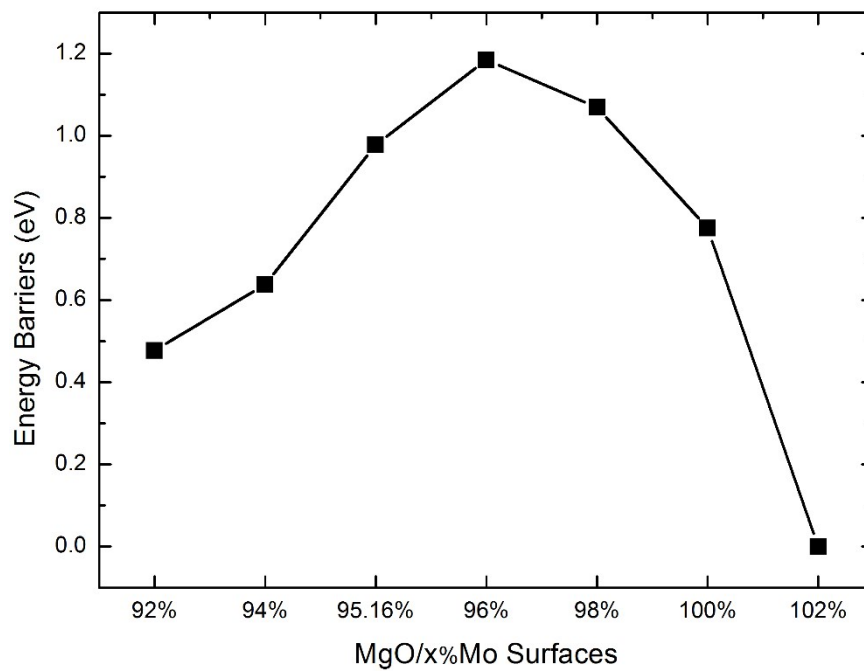

Fig. S4. The relationship between energy barriers and lattice constants of Mo substrate for the splitting of OOH.
